# Supplementary material for: Factors associated with recruitment, surveillance participation, and retention in an observational study of pregnant women and influenza
Source: Springer Nature journal article supplement (doi:10.1186/s12884-019-2280-0), 2019-05-08
Supplement: MOESM2 [file 16709226]

**Supplemental Table A. Multivariable Analyses Including Covariates with Significant Bivariate Associations**

**A. Cohort Enrollees Compared to Medical Enrollees in Year One**

Logistic Regression Predicting Medical (vs. Cohort)

|                                        | B     | S.E. | Wald  | df | Sig. | Exp(B) | 95% C.I. for EXP(B) |       |
|----------------------------------------|-------|------|-------|----|------|--------|---------------------|-------|
|                                        |       |      |       |    |      |        | Lower               | Upper |
| Study site (two vs. 1)                 | -1.79 | 0.33 | 28.77 | 1  | 0.00 | 0.17   | 0.09                | 0.32  |
| White (vs. non-white)                  | 0.37  | 0.24 | 2.44  | 1  | 0.12 | 1.45   | 0.91                | 2.32  |
| Hispanic (vs. non-Hispanic)            | -0.01 | 0.29 | 0.00  | 1  | 0.99 | 1.00   | 0.56                | 1.76  |
| Pregnancy complication (vs. not)       | 1.20  | 0.37 | 10.33 | 1  | 0.00 | 3.31   | 1.60                | 6.88  |
| ARI visit prior to pregnancy (vs. not) | 0.76  | 0.24 | 10.32 | 1  | 0.00 | 2.15   | 1.35                | 3.42  |
| Flu vaccinated (vs. not)               | 1.05  | 0.23 | 20.15 | 1  | 0.00 | 2.86   | 1.81                | 4.52  |
| Maternal age (years)                   | -0.04 | 0.02 | 2.81  | 1  | 0.09 | 0.96   | 0.92                | 1.01  |
| Gestational age (days)                 | 0.00  | 0.00 | 0.84  | 1  | 0.36 | 1.00   | 0.99                | 1.00  |
| Married (vs. not)                      | 0.14  | 0.38 | 0.13  | 1  | 0.72 | 1.15   | 0.55                | 2.41  |
| Education (High School [REF])          |       |      | 7.00  | 2  | 0.03 |        |                     |       |
| College                                | -0.38 | 0.35 | 1.17  | 1  | 0.28 | 0.69   | 0.35                | 1.36  |
| Advanced Degree                        | -1.11 | 0.45 | 6.04  | 1  | 0.01 | 0.33   | 0.14                | 0.80  |
| Subjective social status (Low [REF])   |       |      | 3.15  | 3  | 0.37 |        |                     |       |
| Medium                                 | -0.25 | 0.57 | 0.19  | 1  | 0.66 | 0.78   | 0.26                | 2.38  |
| High                                   | -0.67 | 0.60 | 1.25  | 1  | 0.26 | 0.51   | 0.16                | 1.66  |
| Missing                                | -0.13 | 0.96 | 0.02  | 1  | 0.89 | 0.88   | 0.14                | 5.74  |
| Self-Rated Health (Low [REF])          |       |      | 12.85 | 2  | 0.00 |        |                     |       |
| Very Good                              | -0.69 | 0.26 | 6.83  | 1  | 0.01 | 0.50   | 0.30                | 0.84  |
| Excellent                              | -1.01 | 0.30 | 11.02 | 1  | 0.00 | 0.37   | 0.20                | 0.66  |
| Constant                               | -0.87 | 1.01 | 0.75  | 1  | 0.39 | 0.42   |                     |       |

## 2. Influenza Vaccination Differences in Year One

### Logistic Regression Predicting Influenza Vaccinated (vs. Not)

|                                        | B     | S.E. | Wald  | df | Sig. | Exp(B) | 95% C.I.for EXP(B) |       |
|----------------------------------------|-------|------|-------|----|------|--------|--------------------|-------|
|                                        |       |      |       |    |      |        | Lower              | Upper |
| Study site (two vs. 1)                 | 0.01  | 0.13 | 0.00  | 1  | 0.96 | 1.01   | 0.78               | 1.31  |
| White (vs. non-white)                  | -0.11 | 0.13 | 0.70  | 1  | 0.40 | 0.90   | 0.70               | 1.16  |
| Hispanic (vs. non-Hispanic)            | 0.00  | 0.16 | 0.00  | 1  | 0.98 | 1.00   | 0.73               | 1.37  |
| Pregnancy complication (vs. not)       | -0.10 | 0.14 | 0.57  | 1  | 0.45 | 0.90   | 0.69               | 1.18  |
| ARI visit prior to pregnancy (vs. not) | 0.39  | 0.15 | 7.08  | 1  | 0.01 | 1.48   | 1.11               | 1.97  |
| Cohort enrollee (vs. Medical)          | 0.70  | 0.14 | 26.35 | 1  | 0.00 | 2.02   | 1.54               | 2.64  |
| Maternal age (years)                   | 0.02  | 0.01 | 2.13  | 1  | 0.14 | 1.02   | 0.99               | 1.04  |
| Gestational age (days)                 | 0.01  | 0.00 | 26.21 | 1  | 0.00 | 1.01   | 1.00               | 1.01  |
| Married (vs. not)                      | 0.02  | 0.22 | 0.01  | 1  | 0.94 | 1.02   | 0.66               | 1.57  |
| Education (High School [REF])          |       |      | 16.66 | 2  | 0.00 |        |                    |       |
| College                                | 0.28  | 0.19 | 2.01  | 1  | 0.16 | 1.32   | 0.90               | 1.93  |
| Advanced Degree                        | 0.77  | 0.23 | 11.60 | 1  | 0.00 | 2.16   | 1.39               | 3.37  |
| Subjective social status (Low [REF])   |       |      | 5.38  | 3  | 0.15 |        |                    |       |
| Medium                                 | 0.10  | 0.34 | 0.09  | 1  | 0.77 | 1.11   | 0.57               | 2.14  |
| High                                   | 0.13  | 0.35 | 0.14  | 1  | 0.71 | 1.14   | 0.58               | 2.25  |
| Missing                                | 1.83  | 0.82 | 5.00  | 1  | 0.03 | 6.23   | 1.25               | 30.94 |
| Child at home (aged <14) (vs. not)     | -0.08 | 0.12 | 0.48  | 1  | 0.49 | 0.92   | 0.74               | 1.16  |
| Self-Rated Health (Low [REF])          |       |      | 1.00  | 2  | 0.61 |        |                    |       |
| Very Good                              | -0.08 | 0.15 | 0.33  | 1  | 0.57 | 0.92   | 0.69               | 1.23  |
| Excellent                              | -0.15 | 0.15 | 0.99  | 1  | 0.32 | 0.86   | 0.63               | 1.16  |
| Stressful events in year (0 [REF])     |       |      | 1.79  | 3  | 0.62 |        |                    |       |
| 1                                      | 0.03  | 0.17 | 0.03  | 1  | 0.87 | 1.03   | 0.73               | 1.44  |
| 2                                      | -0.17 | 0.18 | 0.96  | 1  | 0.33 | 0.84   | 0.59               | 1.19  |
| 3                                      | -0.09 | 0.17 | 0.30  | 1  | 0.58 | 0.91   | 0.66               | 1.26  |
| Constant                               | -1.40 | 0.55 | 6.46  | 1  | 0.01 | 0.25   |                    |       |

### 3. Characteristics Associated with Participation in Follow-up Surveillance

#### Logistic Regression Predicting Starting Surveillance vs. Not

|                                        | B     | S.E. | Wald  | df | Sig. | Exp(B) | 95% C.I. for EXP(B) |       |
|----------------------------------------|-------|------|-------|----|------|--------|---------------------|-------|
|                                        |       |      |       |    |      |        | Lower               | Upper |
| Study site (two vs. 1)                 | 0.64  | 0.17 | 13.55 | 1  | 0.00 | 1.89   | 1.35                | 2.65  |
| White (vs. non-white)                  | -0.44 | 0.15 | 8.26  | 1  | 0.00 | 0.64   | 0.48                | 0.87  |
| Hispanic (vs. non-Hispanic)            | 0.46  | 0.20 | 5.22  | 1  | 0.02 | 1.58   | 1.07                | 2.33  |
| ARI visit prior to pregnancy (vs. not) | -0.39 | 0.16 | 5.71  | 1  | 0.02 | 0.68   | 0.49                | 0.93  |
| Maternal age (years)                   | -0.02 | 0.02 | 2.12  | 1  | 0.15 | 0.98   | 0.95                | 1.01  |
| Gestational age (days)                 | -0.01 | 0.00 | 23.97 | 1  | 0.00 | 0.99   | 0.99                | 1.00  |
| Child at home (aged <14) (vs. not)     | -0.48 | 0.15 | 10.76 | 1  | 0.00 | 0.62   | 0.46                | 0.82  |
| Constant                               | 3.26  | 0.57 | 32.83 | 1  | 0.00 | 26.07  |                     |       |

#### Logistic Regression Predicting Exclusive Use of the Website for Surveillance vs. Other

|                                        | B     | S.E. | Wald   | df | Sig. | Exp(B) | 95% C.I. for EXP(B) |       |
|----------------------------------------|-------|------|--------|----|------|--------|---------------------|-------|
|                                        |       |      |        |    |      |        | Lower               | Upper |
| Study site (two vs. 1)                 | 1.88  | 0.17 | 129.33 | 1  | 0.00 | 6.55   | 4.74                | 9.06  |
| White (vs. non-white)                  | -0.18 | 0.18 | 1.02   | 1  | 0.31 | 0.84   | 0.59                | 1.18  |
| Hispanic (vs. non-Hispanic)            | 0.35  | 0.26 | 1.77   | 1  | 0.18 | 1.41   | 0.85                | 2.34  |
| Pregnancy complication (vs. not)       | -0.11 | 0.17 | 0.41   | 1  | 0.52 | 0.90   | 0.65                | 1.25  |
| ARI visit prior to pregnancy (vs. not) | 0.07  | 0.17 | 0.16   | 1  | 0.69 | 1.07   | 0.77                | 1.48  |
| Flu vaccinated (vs. not)               | 0.45  | 0.17 | 7.11   | 1  | 0.01 | 1.57   | 1.13                | 2.19  |
| Maternal age (years)                   | 0.01  | 0.02 | 0.11   | 1  | 0.74 | 1.01   | 0.98                | 1.04  |
| Gestational age (days)                 | 0.00  | 0.00 | 1.43   | 1  | 0.23 | 1.00   | 1.00                | 1.00  |
| Married (vs. not)                      | -0.95 | 0.35 | 7.21   | 1  | 0.01 | 0.39   | 0.19                | 0.77  |
| Education (High School [REF])          |       |      | 0.64   | 2  | 0.73 |        |                     |       |
| College                                | 0.21  | 0.28 | 0.56   | 1  | 0.45 | 1.24   | 0.71                | 2.14  |
| Advanced Degree                        | 0.16  | 0.31 | 0.26   | 1  | 0.61 | 1.17   | 0.64                | 2.12  |
| Child at home (aged <14) (vs. not)     | -0.40 | 0.15 | 7.45   | 1  | 0.01 | 0.67   | 0.51                | 0.89  |
| Constant                               | -2.53 | 0.61 | 17.02  | 1  | 0.00 | 0.08   |                     |       |

#### 4. Characteristics of Women Retained Compared to Those Lost to 6-Month Post-Delivery Follow-up

##### Logistic Regression Predicting Completed 6-Month Follow-up Interview (vs. Not)

|                                        | B     | S.E. | Wald  | df | Sig. | Exp(B) | 95% C.I. for EXP(B) |       |
|----------------------------------------|-------|------|-------|----|------|--------|---------------------|-------|
|                                        |       |      |       |    |      |        | Lower               | Upper |
| Study site (two vs. 1)                 | 1.27  | 0.25 | 25.64 | 1  | 0.00 | 3.56   | 2.18                | 5.83  |
| White (vs. non-white)                  | 0.13  | 0.21 | 0.37  | 1  | 0.54 | 1.14   | 0.75                | 1.72  |
| Hispanic (vs. non-Hispanic)            | -0.09 | 0.26 | 0.13  | 1  | 0.72 | 0.91   | 0.55                | 1.51  |
| ARI visit prior to pregnancy (vs. not) | -0.47 | 0.21 | 4.97  | 1  | 0.03 | 0.63   | 0.41                | 0.95  |
| Flu vaccinated (vs. not)               | 0.26  | 0.20 | 1.60  | 1  | 0.21 | 1.29   | 0.87                | 1.93  |
| Maternal age (years)                   | 0.07  | 0.02 | 12.22 | 1  | 0.00 | 1.08   | 1.03                | 1.12  |
| Married (vs. not)                      | -0.91 | 0.30 | 9.49  | 1  | 0.00 | 0.40   | 0.23                | 0.72  |
| Education (High School [REF])          |       |      | 3.31  | 2  | 0.19 |        |                     |       |
| College                                | 0.22  | 0.30 | 0.52  | 1  | 0.47 | 1.24   | 0.69                | 2.23  |
| Advanced Degree                        | 0.62  | 0.38 | 2.69  | 1  | 0.10 | 1.85   | 0.89                | 3.86  |
| Subjective social status (Low [REF])   |       |      | 6.90  | 3  | 0.08 |        |                     |       |
| Medium                                 | 0.66  | 0.44 | 2.33  | 1  | 0.13 | 1.94   | 0.83                | 4.56  |
| High                                   | 0.23  | 0.46 | 0.26  | 1  | 0.61 | 1.26   | 0.52                | 3.08  |
| Missing                                | -0.26 | 0.74 | 0.12  | 1  | 0.73 | 0.77   | 0.18                | 3.32  |
| Child at home (aged <14) (vs. not)     | 0.52  | 0.20 | 6.57  | 1  | 0.01 | 0.71   | 0.59                | 0.98  |
| Self-Rated Health (Low [REF])          |       |      | 6.59  | 2  | 0.04 |        |                     |       |
| Very Good                              | 0.52  | 0.25 | 4.32  | 1  | 0.04 | 1.69   | 1.03                | 2.76  |
| Excellent                              | -0.04 | 0.24 | 0.02  | 1  | 0.88 | 0.97   | 0.60                | 1.55  |
| Smoker (vs. not)                       | -0.39 | 0.21 | 3.51  | 1  | 0.06 | 0.68   | 0.45                | 1.02  |
| Constant                               | -0.98 | 0.72 | 1.85  | 1  | 0.17 | 0.38   |                     |       |

**Supplemental Table B. The surveillance methods used and the percentage of weekly reports completed by method or combination of methods**

|                                  | Completed One or More<br>Surveillance Reports<br>N (Col %) | Among Surveillance<br>Participants, Percentage<br>(95% CI) of Weeks<br>with Completed<br>Reports |
|----------------------------------|------------------------------------------------------------|--------------------------------------------------------------------------------------------------|
| Total N                          | 1,106 ( 100 )                                              | 55 (53-56)                                                                                       |
| Number of Methods Used           |                                                            | p < .0005                                                                                        |
| Used only one method             | 566 ( 51 )                                                 | 50 (48-52)                                                                                       |
| Used two or more methods         | 540 ( 49 )                                                 | 60 (58-61)                                                                                       |
| Surveillance Methods             |                                                            |                                                                                                  |
| Used Internet Website            | 815 ( 74 )                                                 | 62 (61-64) p < .0005                                                                             |
| Did Not                          | 292 ( 26 )                                                 | 33 (31-35)                                                                                       |
| Used Telephone CATI              | 674 ( 61 )                                                 | 53 (52-54) p = .004                                                                              |
| Did Not                          | 432 ( 39 )                                                 | 57 (54-60)                                                                                       |
| Used Telephone automated IVR     | 115 ( 10 )                                                 | 57 (53-61) p = .27                                                                               |
| Did Not                          | 991 ( 90 )                                                 | 54 (53-56)                                                                                       |
| Surveillance Method Combinations |                                                            | p < .0005                                                                                        |
| Used neither Web or CATI         | 112 ( 10 )                                                 | 30 (27-34)                                                                                       |
| Used CATI only                   | 180 ( 16 )                                                 | 35 (33-37)                                                                                       |
| Used Web only                    | 320 ( 29 )                                                 | 66 (64-69)                                                                                       |
| Used Both Web and CATI           | 494 ( 45 )                                                 | 60 (58-61)                                                                                       |

Abbreviations: CATI (Computer assisted telephone interviewing delivered by trained staff to ask questions using a structured interview); IVR (interactive voice response is a technology that allows a computer to interact with humans through the use of voice and tones input via their key pad); web (Internet-based website with surveillance questions)

**Supplemental Table C. Characteristics of Cohort Participants who Completed Combinations of Computer Automated Telephone Interview (CATI) and Website Methods of Active Surveillance for Acute Respiratory Illness**

|                                        | Cohort Enrollees<br>(Year 1)<br>N (Col. %) | Combination of Surveillance Methods Used, N (Row %) |                   |                      |                                  | p-value   |
|----------------------------------------|--------------------------------------------|-----------------------------------------------------|-------------------|----------------------|----------------------------------|-----------|
|                                        |                                            | Used Neither <sup>a</sup>                           | Used CATI<br>Only | Used Website<br>Only | Used Both<br>CATI and<br>Website |           |
| Total N                                | 1,374 ( 100 )                              | 379 ( 28 )                                          | 180 ( 13 )        | 321 ( 23 )           | 494 ( 36 )                       |           |
| <u>Medical Record Variables</u>        |                                            |                                                     |                   |                      |                                  |           |
| Study Site                             |                                            |                                                     |                   |                      |                                  | p < .0005 |
| Site 1                                 | 565 ( 41 )                                 | 98 ( 17 )                                           | 31 ( 5 )          | 239 ( 42 )           | 197 ( 35 )                       |           |
| Site 2                                 | 809 ( 59 )                                 | 281 ( 35 )                                          | 149 ( 18 )        | 82 ( 10 )            | 297 ( 37 )                       |           |
| Race                                   |                                            |                                                     |                   |                      |                                  | p < .0005 |
| White                                  | 934 ( 68 )                                 | 223 ( 24 )                                          | 94 ( 10 )         | 256 ( 27 )           | 361 ( 39 )                       |           |
| Non-White                              | 440 ( 32 )                                 | 156 ( 35 )                                          | 86 ( 20 )         | 65 ( 15 )            | 133 ( 30 )                       |           |
| Ethnicity                              |                                            |                                                     |                   |                      |                                  | p < .0005 |
| Hispanic/Latina                        | 173 ( 13 )                                 | 64 ( 37 )                                           | 36 ( 21 )         | 24 ( 14 )            | 49 ( 28 )                        |           |
| Non-Hispanic                           | 1,201 ( 87 )                               | 315 ( 26 )                                          | 144 ( 12 )        | 297 ( 25 )           | 445 ( 37 )                       |           |
| High Risk Medical Conditions           |                                            |                                                     |                   |                      |                                  | p = .002  |
| Chronic Condition (prior to pregnancy) | 277 ( 20 )                                 | 68 ( 25 )                                           | 27 ( 10 )         | 88 ( 32 )            | 94 ( 34 )                        |           |
| No condition                           | 1,097 ( 80 )                               | 311 ( 28 )                                          | 153 ( 14 )        | 233 ( 21 )           | 400 ( 36 )                       |           |
| Pregnancy Complication                 |                                            |                                                     |                   |                      |                                  | p = .24   |
| No complication                        | 1,034 ( 75 )                               | 287 ( 28 )                                          | 141 ( 14 )        | 249 ( 24 )           | 357 ( 35 )                       |           |
| Complication                           | 340 ( 25 )                                 | 92 ( 27 )                                           | 39 ( 11 )         | 72 ( 21 )            | 137 ( 40 )                       |           |
| Medical visits for ARI (1 or more)     |                                            |                                                     |                   |                      |                                  | p = .82   |
| Year Prior to Study (12 months)        | 320 ( 23 )                                 | 86 ( 27 )                                           | 47 ( 15 )         | 74 ( 23 )            | 113 ( 35 )                       |           |

|                                            |              |            |            |            |            |           |
|--------------------------------------------|--------------|------------|------------|------------|------------|-----------|
| No visit                                   | 1,054 ( 77 ) | 293 ( 28 ) | 133 ( 13 ) | 247 ( 23 ) | 381 ( 36 ) | p = .002  |
| Study Period (6 months)                    | 307 ( 22 )   | 91 ( 30 )  | 38 ( 12 )  | 79 ( 26 )  | 99 ( 32 )  |           |
| No visit                                   | 1,067 ( 78 ) | 288 ( 27 ) | 142 ( 13 ) | 242 ( 23 ) | 395 ( 37 ) | p = .003  |
| Study Season's Influenza Vaccine (receive) | 1,038 ( 76 ) | 276 ( 27 ) | 120 ( 12 ) | 251 ( 24 ) | 391 ( 38 ) |           |
| Not received                               | 336 ( 24 )   | 103 ( 31 ) | 60 ( 18 )  | 71 ( 21 )  | 103 ( 31 ) |           |
| <u>Interview variables, N (Col. %)</u>     |              |            |            |            |            |           |
| Woman's Age (at start of season), Years    |              |            |            |            |            | p = .16   |
| <25                                        | 112 ( 8 )    | 32 ( 29 )  | 16 ( 14 )  | 30 ( 27 )  | 34 ( 30 )  |           |
| 25-29                                      | 317 ( 23 )   | 82 ( 26 )  | 46 ( 15 )  | 75 ( 24 )  | 114 ( 36 ) |           |
| 30-34                                      | 558 ( 41 )   | 137 ( 25 ) | 67 ( 12 )  | 135 ( 24 ) | 219 ( 39 ) |           |
| ≥35                                        | 387 ( 28 )   | 128 ( 33 ) | 51 ( 13 )  | 81 ( 21 )  | 127 ( 33 ) |           |
| Gestational Age (at start of season), Days |              |            |            |            |            | p < .0005 |
| <137                                       | 339 ( 25 )   | 44 ( 13 )  | 21 ( 6 )   | 126 ( 37 ) | 148 ( 44 ) |           |
| 137-172                                    | 363 ( 26 )   | 87 ( 24 )  | 54 ( 15 )  | 67 ( 18 )  | 155 ( 43 ) |           |
| 173-224                                    | 356 ( 26 )   | 69 ( 19 )  | 52 ( 15 )  | 72 ( 20 )  | 163 ( 46 ) |           |
| ≥225                                       | 316 ( 23 )   | 179 ( 57 ) | 53 ( 17 )  | 56 ( 18 )  | 28 ( 9 )   |           |
| Race (Research Categories)                 |              |            |            |            |            | p < .0005 |
| White                                      | 934 ( 68 )   | 223 ( 24 ) | 94 ( 10 )  | 256 ( 27 ) | 361 ( 39 ) |           |
| Asian                                      | 205 ( 15 )   | 64 ( 31 )  | 31 ( 15 )  | 33 ( 16 )  | 77 ( 38 )  |           |
| Black                                      | 64 ( 5 )     | 29 ( 45 )  | 19 ( 30 )  | 6 ( 9 )    | 10 ( 16 )  |           |
| Mixed or Other                             | 171 ( 12 )   | 63 ( 37 )  | 36 ( 21 )  | 26 ( 15 )  | 46 ( 27 )  |           |
| Marital Status                             |              |            |            |            |            | p = .004  |
| Married or Partnered                       | 1,286 ( 94 ) | 347 ( 27 ) | 161 ( 13 ) | 309 ( 24 ) | 469 ( 36 ) |           |
| Not Married and Not Partnered              | 88 ( 6 )     | 32 ( 36 )  | 19 ( 22 )  | 12 ( 14 )  | 25 ( 28 )  |           |
| Education                                  |              |            |            |            |            | p = .019  |
| High school or less                        | 119 ( 9 )    | 44 ( 37 )  | 18 ( 15 )  | 25 ( 21 )  | 32 ( 27 )  |           |



|                                        |              |            |            |            |            |
|----------------------------------------|--------------|------------|------------|------------|------------|
| Some college or bachelors degree       | 744 ( 54 )   | 207 ( 28 ) | 104 ( 14 ) | 181 ( 24 ) | 252 ( 34 ) |
| Advanced degree                        | 511 ( 37 )   | 128 ( 25 ) | 58 ( 11 )  | 115 ( 23 ) | 210 ( 41 ) |
| Subjective social status               |              |            |            |            | p = .015   |
| 1 to 3 (low)                           | 25 ( 2 )     | 6 ( 24 )   | 7 ( 28 )   | 5 ( 20 )   | 7 ( 28 )   |
| 4 to 6 (medium)                        | 697 ( 51 )   | 209 ( 30 ) | 80 ( 11 )  | 176 ( 25 ) | 232 ( 33 ) |
| 7 to 9 (high)                          | 632 ( 46 )   | 156 ( 25 ) | 93 ( 15 )  | 137 ( 22 ) | 246 ( 39 ) |
| <i>Missing or refused</i>              | 20 ( 1 )     | 8 ( 40 )   | 0 ( 0 )    | 3 ( 15 )   | 9 ( 45 )   |
| Child(ren) aged <13 years at home      |              |            |            |            | p < .0005  |
| No                                     | 644 ( 47 )   | 136 ( 21 ) | 81 ( 13 )  | 170 ( 26 ) | 257 ( 40 ) |
| Yes child                              | 730 ( 53 )   | 243 ( 33 ) | 99 ( 14 )  | 151 ( 21 ) | 237 ( 32 ) |
| Self-rated Health Status               |              |            |            |            | p = .028   |
| Poor, fair, or good                    | 301 ( 22 )   | 91 ( 30 )  | 45 ( 15 )  | 69 ( 23 )  | 96 ( 32 )  |
| Very good                              | 548 ( 40 )   | 155 ( 28 ) | 71 ( 13 )  | 143 ( 26 ) | 179 ( 33 ) |
| Excellent                              | 525 ( 38 )   | 133 ( 25 ) | 64 ( 12 )  | 109 ( 21 ) | 219 ( 42 ) |
| Smoking                                |              |            |            |            | p = .09    |
| Never smoked                           | 1,016 ( 74 ) | 275 ( 27 ) | 122 ( 12 ) | 238 ( 23 ) | 381 ( 38 ) |
| Previously or currently smoke          | 358 ( 26 )   | 104 ( 29 ) | 58 ( 16 )  | 83 ( 23 )  | 113 ( 32 ) |
| Stressful events in past year (number) |              |            |            |            | p = .24    |
| 0                                      | 276 ( 20 )   | 68 ( 25 )  | 37 ( 13 )  | 62 ( 22 )  | 109 ( 39 ) |
| 1                                      | 349 ( 25 )   | 90 ( 26 )  | 41 ( 12 )  | 84 ( 24 )  | 134 ( 38 ) |
| 2                                      | 310 ( 23 )   | 85 ( 27 )  | 36 ( 12 )  | 84 ( 27 )  | 105 ( 34 ) |
| 3 or more                              | 439 ( 32 )   | 136 ( 31 ) | 66 ( 15 )  | 91 ( 21 )  | 146 ( 33 ) |

---

Abbreviations: NA (not applicable); ARI (Acute respiratory illness); CATI (Computer assisted telephone interviewing); web (Internet-based website)

<sup>a</sup> Includes those who never started surveillance and those who used IVR (interactive voice response) only.
